# Supplementary material for: Mid-term health-related quality of life in community-acquired bacterial meningitis survivors; the COMBAT study
Source: PLoS One. 2023 Mar 23;18(3):e0281544. doi: 10.1371/journal.pone.0281544 (PMC10035867; doi:10.1371/journal.pone.0281544)
Supplement: S1 Table — (DOCX) [file pone.0281544.s001.docx]

**Supporting information:**

**S1 Table. Bivariate analysis between independent variables and QOL’s domains**

| **Variables** | **Physical health QOL** | **Mental health QOL** | **Environmental QOL** | **Social relationships QOL** |
| --- | --- | --- | --- | --- |
| **Background characteristics** | | | | |
| Sex (Female) | 0.025a | 0.039a | 0.321a | 0.593a |
| Age | <0.001b | 0.840 b | 0.755 b | 0.058 b |
| Social professional categories | <0.001c | 0.174c | 0.003c | <0.001c |
| **Health status** | | | | |
| Chronic diseases / Cancer (<5 years) | 0.003a | 0.475a | 0.394a | 0.019a |
| Alcohol abuse | 0.060a | 0.647 a | 0.107a | 0.007a |
| Active smoking | 0.120 a | 0.078 a | 0.104a | 0.970a |
| Undernutrition | 0.642 a | 0.340 a | 0.610a | 0.749a |
| Recurrent meningitis | 0.942 a | 0.870 a | 0.582a | 0.792a |
| **CABM Clinical course** | | | | |
| Causative microorganisms | 0.031c | 0.721c | 0.767c | 0.209c |
| Corticoids | 0.940 a | 0.729 a | 0.761 a | 0.509 a |
| Admission in ICU | 0.864 a | 0.646 a | 0.060a | 0.198a |
| Seizures | 0.354 a | 0.185 a | 0.384a | 0.009a |
| Coma | 0.988 a | 0.078 a | 0.821a | 0.781a |
| **12-month follow-up CABM impairments** | | | | |
| GOS | <0.001 a | <0.001 a | <0.001 a | <0.001 a |
| Headache | <0.001 a | <0.001 a | 0.010 a | 0.107 a |
| Hearing impairment | <0.001 c | 0.038 c | 0.003c | 0.376c |

aMann-Whitney; bPearson correlation; cANOVA
